1           **Function of a novel nasal protrusion for oral-shelling within an adaptive**  
2                                                   **radiation of pupfishes**

3  
4                                           Michelle E. St. John<sup>1</sup>, Kristi Dixon<sup>2</sup>, Christopher H. Martin\*

5  
6  
7       <sup>1</sup>Department of Integrative Biology and Museum of Vertebrate Zoology, University of  
8 California, Berkeley, CA 94720, USA

9  
10     <sup>2</sup>Department of Biology, University of North Carolina at Chapel Hill, 120 South Rd, NC 27599,  
11 USA

12  
13  
14     \*Corresponding Author: [chmartin@berkeley.edu](mailto:chmartin@berkeley.edu)

15  
16  
17  
18  
19  
20  
21  
22  
23  
24  
25  
26     Short title: Function of nasal protrusion  
27     keywords: adaptive radiation, speciation, novelty, performance, durophagy, craniofacial,  
28     foraging  
29     Abstract: 293 words, Main text plus references: 4988 words, 3 Figures, Supplemental Figures  
30     S1&S2, and 1 Supplemental video S1

32 **Significance Statement**

33 Specialization on hard-shell prey items (i.e. durophagy) is a common dietary niche among fishes.

34 Oral shelling is a rare technique used by some durophagous fish to consume prey items like

35 snails; however, adaptations for oral shelling are still unknown. Here, we document the first

36 evidence of oral shelling in a cyprinodontiform fish, the durophagous pupfish (*Cyprinodon*

37 *brontotheroides*), and experimentally test whether its novel nasal protrusion is an adaptation for

38 oral shelling using hybrid feeding trials.

39

40

41

42

43

44

45

46

47

48

49

50

51

52

53

54

55 **Abstract**

56 Dietary specialization on hard prey items, such as mollusks and crustaceans, is commonly  
57 observed in a diverse array of fish species. Many fish consume these types of prey by crushing  
58 the shell to consume the soft tissue within, but a few fishes extricate the soft tissue without  
59 breaking the shell using a method known as oral shelling. Oral shelling involves pulling a  
60 mollusk from its shell and may be a way to subvert an otherwise insurmountable shell defense.  
61 However, the biomechanical requirements and potential adaptations for oral shelling are  
62 unknown. Here, we test the hypothesis that a novel nasal protrusion is an adaptation for oral  
63 shelling in a durophagous pupfish (*Cyprinodon brontotheroides*). We first demonstrate oral  
64 shelling in this species and then predicted that a larger nasal protrusion would allow pupfish to  
65 consume larger snails. Durophagous pupfish are found within an endemic radiation of pupfish on  
66 San Salvador Island, Bahamas. We took advantage of closely related sympatric species and  
67 outgroups to test: 1) whether durophagous pupfish shell and consume more snails than other  
68 species, 2) if F1 and F2 durophagous hybrids consume similar amounts of snails as purebred  
69 durophagous pupfish, and 3) to determine if nasal protrusion size in parental and hybrid  
70 populations increases the maximum diameter snail consumed. We found that durophagous  
71 pupfish and their hybrids consumed the most snails, but did not find a strong association between  
72 nasal protrusion size and maximum snail size consumed within the parental or F2 hybrid  
73 population, suggesting that the size of their novel nasal protrusion does not provide a major  
74 benefit in oral shelling. Instead, we suggest that nasal protrusion may increase feeding efficiency,  
75 act as a sensory organ, or is a sexually selected trait, and that a strong feeding preference may be  
76 most important for oral shelling.

77

78 **Introduction**

79 Dietary specialization is thought to be one way to reduce competition for a food source or to  
80 forage more optimally (Pyke 1984; Futuyman and Moreno 1988; Robinson and Wilson 1998).  
81 One form of dietary specialization, especially among fishes, is the increased consumption of  
82 hard-shelled prey items, such as mollusks and crustaceans (hereafter referred to as durophagy),  
83 and both freshwater and marine fishes include durophagous specialists. There are two main ways  
84 that fish consume hard-shelled prey items: First, fish may crush or break the outer shell to  
85 consume the soft tissue within. Some fishes, such as black carp (*Mylopharyngodon picesus*),  
86 pumpkinseed sunfish (*Lepomis gibbosus*), redear sunfish (*Lepomis microlophus*), black drum  
87 (*Pogonias cromis*), Florida pompano (*trachinotus carolinus*), and the black margate  
88 (*Anisotremus surinamensis*), use their pharyngeal jaws to crush the shells of snails and other  
89 mollusks in order to consume them (Lauder 1983; Grubich 2003; Gidmark et al. 2015). Others,  
90 such as the striped burrfish (*Chilomycterus schoepfi*), use their fused oral teeth to manipulate and  
91 crush shells (Winterbottom 1974; Ralston and Wainwright 1997). The biomechanical constraints  
92 of crushing hard shells is well documented in fish. For example, body mass (g), bite force (N),  
93 and pharyngeal jaw gape size are understood to limit the upper size of prey in the Caribbean  
94 hogfish (*Lachnolaimus maximus*), where larger fish generally produce both larger gapes and  
95 increased crushing force, allowing them to crush larger or thicker shells (Wainwright 1987,  
96 1991). Similarly, the upper prey size consumed by black carp is limited by 1) the amount of  
97 force produced by its pharyngeal jaw closing muscle (*medial levator arcus branchialis V*)  
98 (Gidmark et al. 2013) and 2) the size of the pharyngeal jaw gape (Gidmark et al. 2015).

99 An alternative and much rarer method of consuming hard-shelled prey, primarily  
100 documented in cichlids endemic to Lake Malawi (*Metriaclima lanisticola*), Lake Victoria

101 (*Hapochromis. xenognathus*, *H. sauvagei* and *Macropleurodus bicolor*), and Lake Edward (*H.*  
102 *concilians sp. nov.*, *H. erutus sp. nov.* and *H. planus sp. nov.*), is to extract the soft tissue of the  
103 gastropod from its shell via wrenching or shaking, known as ‘oral shelling’ (Slootweg 1987;  
104 Madsen et al. 2010; Lundebeba et al. 2011; Vranken et al. 2019). It is typically thought that oral  
105 shelling is a way to circumvent the force and pharyngeal gape size requirements for consuming  
106 large mollusks because oral shelling does not require a fish to break a mollusk’s shell; however,  
107 very few studies have investigated oral shelling in general (but see: Slootweg 1987; De Visser  
108 and Barel 1996) nor have they investigated adaptations for oral shelling.

109         One possibility may be that fish use morphological adaptations to create a mechanical  
110 advantage during oral shelling. For example, one hypothesis is that the fleshy snout of  
111 *Labeotropheus* cichlids is used as a fulcrum, allowing fish to more easily crop algae from rocks  
112 versus the bite-and-twist method observed in other cichlid species (Konings 2007; Conith et al.  
113 2018), and specifically that increased snout depth may help create this mechanical advantage  
114 (Conith et al. 2019). A similar method may be used during oral shelling to amplify force while  
115 removing snails from their shells. Thus, we predicted that larger nasal fulcrums should provide  
116 greater mechanical advantage for successfully oral shelling larger prey.

117         The durophagous pupfish (*Cyprinodon brontotheroides*) is an excellent species for testing  
118 whether a novel morphological trait provides a mechanical advantage for oral shelling.  
119 Durophagous pupfish are found within an adaptive radiation of pupfish endemic to the  
120 hypersaline lakes of San Salvador Island, Bahamas, which also includes a generalist pupfish (*C.*  
121 *variegatus*) and a scale-eating pupfish (*C. desquamator*; Martin and Wainwright 2011, 2013a).  
122 Geological evidence suggests that the hypersaline lakes of San Salvador Island, and thus the  
123 radiation itself, are less than 10,000 years old (Hagey and Mylroie 1995; Martin and Wainwright

124 2013*b*, 2013*a*). Phylogenetic evidence also indicates that: 1) generalist pupfish found outside San  
125 Salvador Island are outgroups to the entire San Salvador clade, and 2) that durophagous pupfish  
126 cluster near generalists from the same lake populations, indicating that there is extensive  
127 admixture between these young species (Martin and Feinstein 2014; Martin 2016; Lencer et al.  
128 2017; Richards and Martin 2017). Gut content analyses indicated that durophagous pupfish  
129 consume approximately 5.5 times the number of mollusks and crustaceans (specifically  
130 ostracods) as generalists and fewer shells, suggesting that durophagous pupfish may be orally  
131 shelling their prey (Martin and Wainwright 2013*b*). In addition to their dietary specialization,  
132 durophagous pupfish also possess a novel nasal protrusion not observed in other pupfish species  
133 (Martin and Wainwright 2013*a*). This nasal protrusion is an expansion of the maxilla, and  
134 extends rostrally over the upper jaws (Hernandez et al. 2018). It is plausible that this nasal  
135 protrusion is an adaptation for oral shelling used by the durophage as a fulcrum.

136 We investigated oral-shelling behavior in the laboratory and tested if the nasal protrusion  
137 of durophagous pupfish is an adaptation for oral shelling. We measured snail consumption across  
138 6 groups in the laboratory: outgroup generalists, generalists from San Salvador Island, scale-  
139 eaters, durophages, and F1 and F2 durophage hybrids (produced by crossing purebred  
140 durophages and generalists in the lab). If the novel nasal protrusion is adapted for oral shelling,  
141 we expected that durophages would consume significantly more snails than generalists and scale-  
142 eaters. We also expected that F1 hybrids would show intermediate snail consumption between  
143 the parental species and that F2 hybrids would show greater variation in snail consumption  
144 compared to parental species. To directly tie nasal protrusion size to snail-shelling performance,  
145 we also investigated whether individuals with larger noses could consume larger snails in lab-  
146 reared populations of both durophages and F2 hybrids. Ultimately, we found that, contrary to our

147 predictions, purebred durophages, F1, and F2 hybrids all shelled significantly more snails than  
148 other pupfish species and we did not find evidence that larger nasal protrusion allowed  
149 durophages to consume larger snails. Instead, we discuss alternative explanations for the novel  
150 nasal protrusion such a putative function in foraging efficiency, sexual selection, olfaction, or  
151 increased area for superficial neuromasts.

152

## 153 **Methods**

### 154 *Collection and Care*

155 During the summer of 2017, we used seine nets to collect generalist, durophage, and scale-eater  
156 pupfishes from Crescent Pond, Little Lake, Osprey Lake, and Oyster Pond (San Salvador Island,  
157 Bahamas). We transported fish back to the University of North Carolina, Chapel Hill, where they  
158 were maintained in mixed-sex stock tanks (37-75 l) in approximately 26° C water at  
159 approximately 5-10 ppt salinity (Instant Ocean salt mix). In the lab, we produced F1 and F2  
160 hybrid offspring using snail-eater and generalist parents. Wild caught individuals were also  
161 allowed to breed and produced F1-F3 purebred offspring. Hybrid and purebred offspring were  
162 used in our feeding assays. We fed all fish a diet of commercial pellet foods, frozen bloodworms,  
163 and mysis shrimp daily.

164 We also maintained a colony of freshwater sinistral snails (*Physella sp.*). We kept snails  
165 in a 7 liter stock tank containing the same water used in pupfish tanks. All snails were acclimated  
166 to 5-10 ppt salinity for at least 48 hours before being used in a feeding trial. We fed snails a diet  
167 of bloodworms every 48 hours. We ran multiple control trials without fish alongside feeding  
168 trials to track natural snail mortality rates.

169

170 *Morphological Measurements*

171 We measured standard length of each fish by measuring the distance from the tip of the upper  
172 jaw to the posterior end of the hypural plate. We also measured nasal protrusion size for a subset  
173 of fish (9 generalists, 50 durophages, 17 F1 hybrids, and 62 F2 hybrids) using image processing  
174 software (Schindelin et al. 2012). Scale-eating pupfish do not exhibit even marginal nasal  
175 protrusion, and therefore we did not include them in this analysis. We measured fish nasal  
176 protrusion size by drawing a tangent line aligning the most anterior dorsal point of the premaxilla  
177 with the neurocranium and measuring a perpendicular line at the deepest part of the nasal region  
178 (Figure 1C).

179  
180 *Feeding Assay*

181 We quantified the number of snails consumed by all three species of pupfish and hybrids using  
182 feeding assays. Prior to a feeding assay, fish were removed from stock tanks and isolated in 2L  
183 trial tanks which contained one synthetic yarn mop to provide cover for the fish. We allowed fish  
184 to acclimate in trial tanks for at least 12 hours before the start of a feeding assay. After the  
185 acclimation time, we haphazardly chose 5 snails from our snail stock tank and added them to  
186 each feeding assay tank. We added one bloodworm to each tank to ensure that even fish which  
187 did not consume any snails had an adequate diet. Fish were allowed to feed freely on snails for  
188 48 hours with no additional food source. At the end of the 48-hour assay period fish were  
189 removed from trial tanks, photographed, and placed back into mixed-sex stock tanks. We then  
190 recorded the number of snails that were consumed (empty shells remaining) and unconsumed.  
191 Finally, we measured the size of each snail shell from the anterior tip of the shell's aperture to  
192 farthest tip of the spire (mm) using digital calipers and image processing software . In total, we  
193 measured feeding success for 13 outgroup generalists, 20 generalists, 55 durophages, 20 scale-



194 eaters, 25 F1 hybrids, and 63 F2 hybrids. Out of the 196 trials, only 11 finished the trial period  
195 with four snail shells instead of the given five, suggesting that at most 3.5% of snail consumption  
196 involved also eating the shell.

197

## 198 *Data Processing*

### 199 *No differences between fully consumed and partially consumed snails*

200 We noticed that a portion of the snails were only partially consumed (i.e. part of the snail tissue  
201 remained in the shell versus a completely empty shell after 48 hours) and therefore used a  
202 generalized linear mixed model (GLMM) with a binomial response distribution to determine if  
203 partially consumed snails should be analyzed separately from fully consumed snails. We  
204 included 1) whether snails were fully or partially consumed as the response variable (binomial  
205 data), 2) species designation as a fixed effect, 3) population and fish ID as random effects, and 4)  
206 log standard length as a covariate. We found that the pattern of partially and fully consumed  
207 snails did not vary across species ( $\chi^2= 2.73$ ,  $df=5$ ,  $P=0.74$ ), and therefore included all partially  
208 consumed snails in the general “consumed” category for the remainder of our analyses.

209

## 210 *Statistical Analysis*

211 We used a linear mixed model to investigate the relationship between nasal protrusion distance  
212 and species. For this analysis we used a subset of our data which includes: 9 generalists, 50  
213 durophages, 17 F1 hybrids, and 62 F2 hybrids. Our model included 1) log nasal protrusion size  
214 as the response variable, 2) species designation, log standard length, and their interaction as fixed  
215 effects, and 3) population as a random effect. We also used Tukey’s HSD to make *post hoc*  
216 comparisons across species.

217 We used a GLMM with a negative binomial distribution to explore whether the number  
218 of snails consumed varied between species. We included 1) whether snails were consumed or  
219 unconsumed as the response variable (binomial data), 2) species designation as a fixed effect, 3)  
220 population and fish ID as random effects, and 4) log standard length as a covariate. We made  
221 additional *post hoc* comparisons between groups using Tukey's HSD.

222 We used a linear mixed model to determine if the size of snails varied by whether they  
223 were consumed or unconsumed and whether that varied between species. We included 1) snail  
224 size (mm) as the response variable, 2) whether snails were consumed or unconsumed, species  
225 designation, and their interaction as fixed effects, 3) population and fish ID as random effects,  
226 and log standard length as a covariate. We made additional *post hoc* comparisons between  
227 groups using contrasts and an FDR correction.

228 Finally, we investigated if nasal protrusion distance affected the maximum size snail an  
229 individual could consume as an estimate of snail-shelling performance. For this analysis we only  
230 considered purebred durophages and F2 hybrids (separately) as they had the largest observed  
231 variance in nasal protrusion size and only included individuals that consumed at least one snail  
232 during the feeding trial. For each group, we used a linear model with 1) the size of the largest  
233 consumed snail for each individual as the response variable, 2) log nasal protrusion size, log  
234 standard size, and their interaction as fixed effects, and 3) the residuals from a linear model  
235 investigating the relationship between snail size and nasal protrusion size as a covariate. We  
236 included this additional covariate because we found a strong positive relationship between mean  
237 snail size provided during trials and nasal protrusion in both purebred durophages (LM:  $P=1.72 \times$   
238  $10^{-9}$ , adjusted  $R^2=0.14$ ) and F2 hybrids (LM:  $P=5.58 \times 10^{-10}$ , adjusted  $R^2=0.12$ ), and wanted to  
239 account for this variation in the model (Figure S2). This variation reflected our attempt to

240 provide some larger snails in trials with larger fish to better assess performance. We additionally  
241 included the random effect of population in our durophage model.

242

### 243 *Ethical Statement*

244 This study was conducted with the approval of the Animal Care and Use Committee of the  
245 University of North Carolina, Chapel Hill, NC (protocol# 15–179.0). All wild fish were collected  
246 with a research and export permit from the Bahamas BEST commission, renewed annually since  
247 2011.

248

### 249 Results

#### 250 *Nasal protrusion size does not vary between purebred durophages and hybrids*

251 Our linear mixed model indicated that nasal protrusion size is significantly associated with log  
252 standard length ( $\chi^2= 27.63$ ,  $df=1$ ,  $P=1.47 \times 10^{-7}$ ), but that this relationship does not vary between  
253 purebred and hybrid durophages ( $\chi^2= 3.22$ ,  $df=3$ ,  $P = 0.36$ ; Figure 1A & S1). *Post hoc* analysis  
254 indicated that generalists had smaller noses than durophages ( $P < 0.0001$ ) and F1 hybrids ( $P =$   
255 0.016).

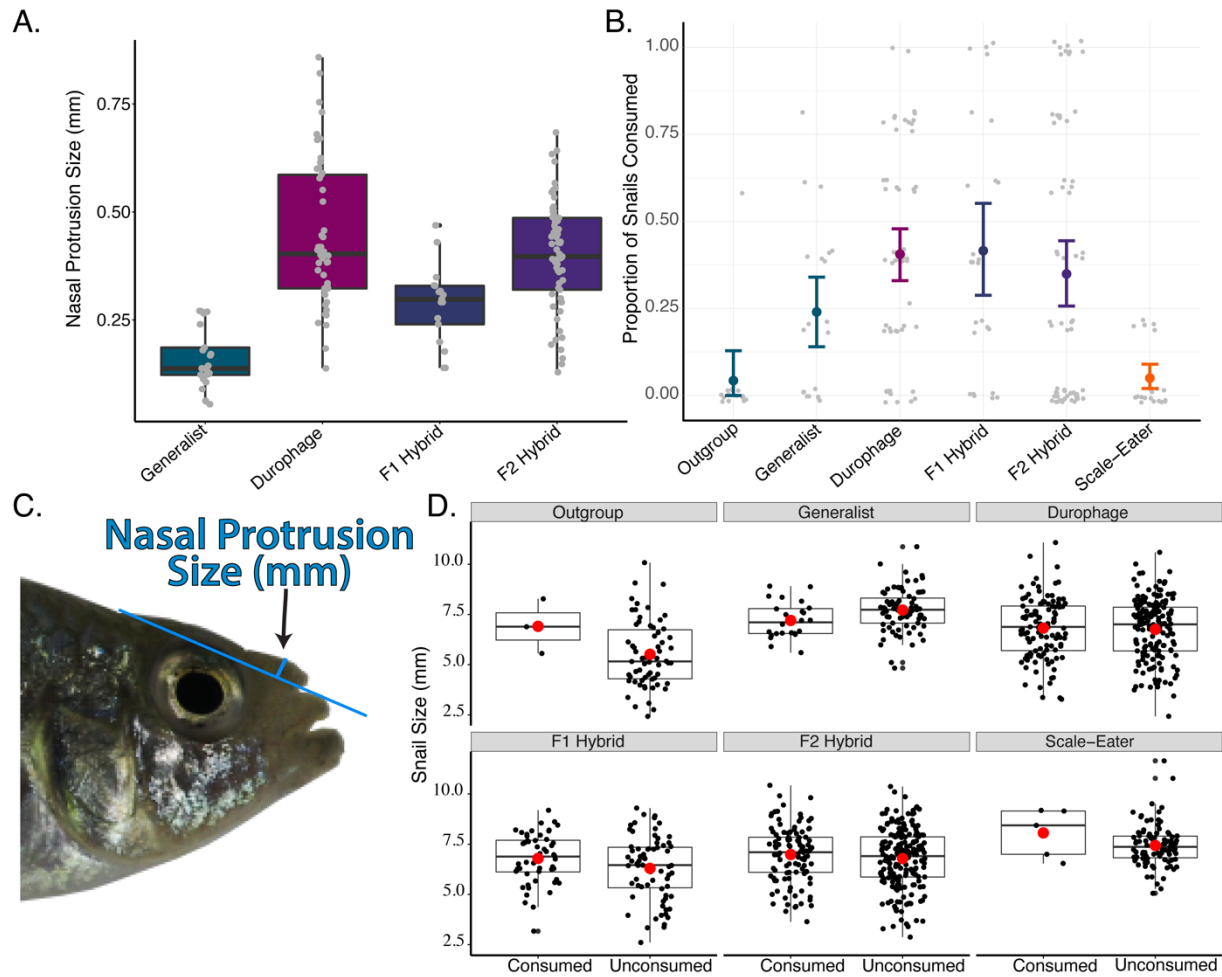

256

257 **Figure 1. Snail consumption, nasal protrusion size, and snail size by species.** A) Variation in

258 nasal protrusion size across pupfish groups. Grey dots represent individual fish. B) Proportion of

259 snails consumed across six groups of pupfish. Colored dots represent mean proportion, and error

260 bars represent 95% confidence intervals (bootstrapping: 1,000 iterations). C) Visualization of

261 how nasal protrusion size was measured (pictured: durophagous pupfish). D) Visualization of the

262 size of consumed and unconsumed snails for each species. Black dots represent individual snails

263 and red dots represent the mean snail size.

264

265

266

267 *Purebred durophages and their hybrids consume the most snails*

268 We found that species designation was a significant predictor for the number of snails an  
269 individual consumed (GLMM;  $\chi^2= 35.61$ ,  $df=5$ ,  $P= 1.129 \times 10^{-6}$ ). Specifically, we found that  
270 durophages, F1 hybrids, and F2 hybrids consumed more snails than the generalist outgroup  
271 population (Lake Cunningham, New Providence Island, Bahamas) and scale-eating pupfish  
272 (Figure 1B). Durophages, F1 hybrids, and F2 hybrids also consumed twice as many snails as  
273 generalists, however this difference was not significant.

274

275 *Consumed snails were larger than unconsumed snails*

276 In general, we found that the size of snails varied 1) by whether they were consumed ( $\chi^2= 4.002$ ,  
277  $df=1$ ,  $P=0.045$ ), and 2) across species ( $\chi^2= 24.79$ ,  $df=5$ ,  $P=0.00015$ ; Figure S1). Specifically, we  
278 found that consumed snails were on average 0.12 mm larger in diameter than unconsumed snails  
279 ( $P=0.046$ ). Generalists and scale-eaters received snails that were approximately 17% larger than  
280 other groups (generalists:  $P=0.016$ ; scale-eaters:  $P=0.02$ ). Although this was unintentional due to  
281 the available size distributions of snails in our colony over the ten month course of the feeding  
282 trails, we believe that it did not introduce a significant bias because 1) larger snails were more  
283 likely to be consumed (in fact there was only an 8% difference between the mean size of snail  
284 given to generalists and scale-eaters vs the mean size of consumed snails) and 2) generalists and  
285 scale-eaters were excluded from analyses which examined how nasal protrusion affected a fish's  
286 ability to consume snails.

287

288 *Nasal protrusion size did not significantly increase the maximum snail size consumed*

289

290 We found no effect of log nasal protrusion size, log standard length, or their interaction on the  
291 size of the largest consumed snail for either durophages ( $P_{\log(\text{nasalprotrusionsize})}=0.49$ ,

292  $P_{\log(\text{standardlength})}=0.61, P_{\text{interaction}}=0.56$ ) or F2 hybrids ( $P_{\log(\text{nasalprotrusionsize})}=0.83,$

293  $P_{\log(\text{standardlength})}=0.66, P_{\text{interaction}}=0.91$ ; Figure 2).

294

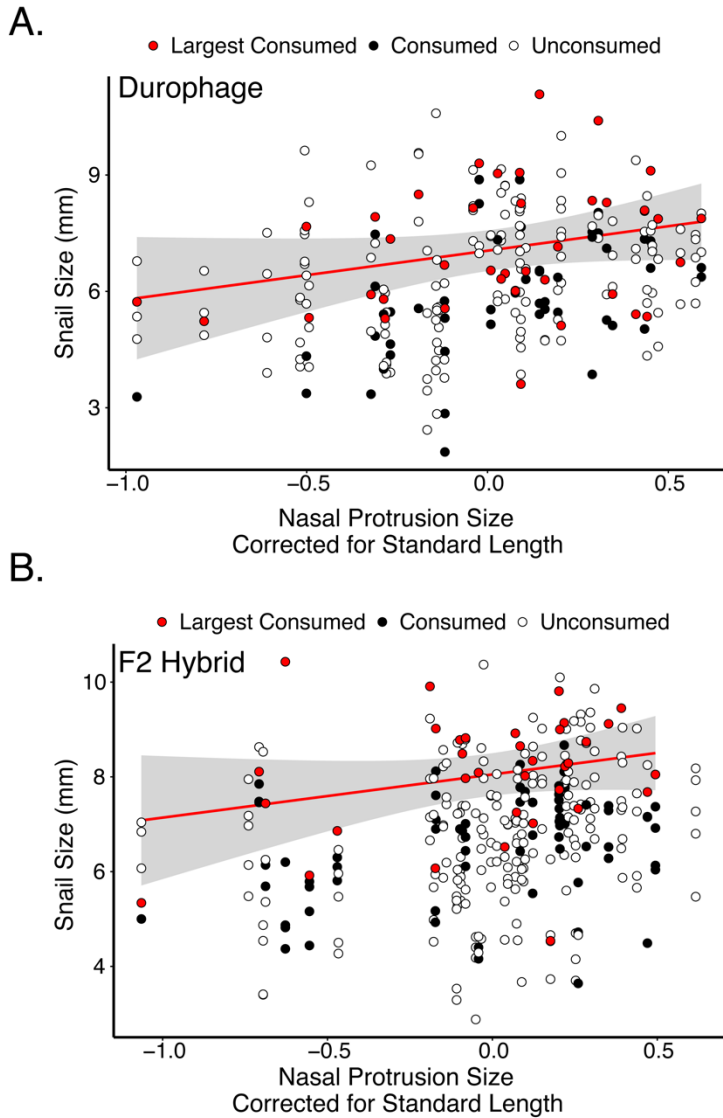

295

296

297 **Figure 2. The maximum prey size a pupfish can consume was not affected by nasal**  
298 **protrusion size.** The X-axis shows nasal protrusion size corrected for standard length while the  
299 Y-axis shows snail size (mm). Red dots show the size of largest consumed snail from each trial,  
300 the red line represents the linear model describing the relationship between nasal protrusion size  
301 and the largest consumed snails, and the grey area represents 95% CI. Closed circles show the  
302 size of other snails that were consumed during trials; open circles show the size of unconsumed  
303 snails.

304 **Discussion**

305 We present the first strong evidence in any cyprinodontiform fish that the durophagous pupfish is  
306 an oral sheller, shaking snails free from their shells rather than crushing or ingesting the whole  
307 shell. This is consistent with their notably non-molariform pharyngeal jaws relative to generalists  
308 and snail-crushing species (Figure 3). We then tested the hypothesis that the durophagous  
309 pupfish's novel nasal protrusion is an adaptation for removing snails from their shells, potentially  
310 functioning as a fulcrum. We predicted that durophagous pupfish would 1) consume more snails  
311 than other groups, and 2) consume larger snails than other groups. We found that both  
312 durophages and their F1 and F2 hybrid offspring consumed the most snails compared to other  
313 groups (Figure 1B), indicating that any substantial amount of durophagous genetic ancestry  
314 increases the number of snails consumed over a 48-hour feeding trial. However, contrary to our  
315 expectations, we found no significant evidence that larger nasal protrusions within hybrid or  
316 parental durophagous pupfish populations enabled the fish to consume larger snails (Figure 2).

317

318 *Durophages have a stronger behavioral preference for snails compared to other species*

319 One explanation for the observed pattern is that durophagous pupfish have a stronger preference  
320 for snails which is independent from their novel nasal protrusion. We see some support for this  
321 within our data. Generalist pupfish from San Salvador Island consumed significantly more snails  
322 than generalists found outside of the radiation on New Providence Island, and even consumed  
323 statistically similar amounts of snails as purebred durophages despite having much smaller nasal  
324 protrusions (Figure 1A&B). It could be that extensive gene flow between generalists and  
325 durophages on San Salvador Island spread alleles for snail-eating preference throughout both  
326 pupfish species (Martin and Feinstein 2014). Alternatively, the common ancestor of durophages



327 and generalists may have had a strong preference for snails (Martin and Feinstein 2014; Richards  
328 and Martin 2017). The increased aggression of both male and female durophages toward  
329 conspecifics by potentially alternate genetic pathways to scale-eaters, as shown in a recent study  
330 (St. John et al. 2019), could also be associated with their stronger preference for aggressively  
331 attacking snails to flip them over before gripping the body of the snail in their oral jaws and  
332 shaking them free from their shells (Supplemental Video 1).

333 Liem's hypothesis and subsequent work has long supported the idea that morphological  
334 specialization need not coincide with trophic specialization, or *vice versa*. For example,  
335 *Tropheops tropheops* and *Metriaclima zebra*, two cichlids from Lake Malawi that are  
336 morphologically specialized for scraping algae often fill a generalist ecological niche, consuming  
337 zooplankton, benthic invertebrates, and phytoplankton (Liem 1978, 1980; McKaye and Marsh  
338 1983), particularly during periods of resource abundance (Martin and Genner 2009). An  
339 analogous argument can be made for individual dietary specialization within a population  
340 (Bolnick et al. 2003). For example, Werner and Sherry (1987) found that individual Cocos  
341 Island finches specialize on a wide variety of taxa including crustacea, nectar, fruit, seeds,  
342 mollusks, and lizards, and that individual dietary specialization was most likely driven by  
343 behavioral differences. Similarly, increased levels of individual specialization in sticklebacks are  
344 driven by shifts in forager density or intraspecific competition (Svanbäck and Bolnick 2005,  
345 2007; Araújo et al. 2008). Thus, individual specialization is often driven entirely by differences  
346 in behavior, feeding preference, or other external factors and can be divorced from adaptive  
347 differences in morphology (Werner and Sherry 1987).

348

349 *Alternative functions of the novel nasal protrusion*

350 We investigated whether an increase in nasal protrusion size affected the maximum size snail an  
351 individual could consume (Figure 2). However, it could be that the novel nasal protrusion is  
352 related to feeding efficiency, e.g. in handling time per snail, or is a sensory organ used for  
353 locating snails more efficiently with potentially increased numbers of superficial neuromasts  
354 (Shibuya et al. 2019). There are several examples of nasal protrusions that are used for this  
355 purpose. The unique rostrums of paddlefish (Polydontidae), sturgeon (Acipenseridae), and  
356 sawfish (Pristidae) are all used as sensory organs, containing electroreceptors, lateral line canals,  
357 and even barbels for detecting prey items (Miller 2006; Wueringer et al. 2012). The novel nasal  
358 protrusion of the durophagous pupfish may also be a sensory organ, however, whether the nasal  
359 protrusion has an increased number of superficial neuromasts is still unknown.

360         Alternatively, the novel nasal protrusion may allow durophagous pupfish to orally shell  
361 snails more quickly, increasing their feeding efficiency. For example, Schluter (1993)  
362 documented that benthic sticklebacks with deep bodies, large mouths, and few, short gill rakers  
363 were more efficient at consuming benthic prey items, while limnetic species of stickleback, with  
364 slender bodies, small mouths, and many, long gill rakers, were more efficient at consuming  
365 limnetic prey items. Interestingly, Schluter (1993, 1995) also found that F1 hybrids had  
366 decreased efficiency feeding on both limnetic and benthic prey items which was primarily due to  
367 their intermediate phenotypes and suggested that reduced fitness in hybrids helps maintain  
368 species boundaries between benthic and limnetic species. It could be that the durophage F1 and  
369 F2 hybrids have similar preferences for gastropods, but cannot consume snails as efficiently due  
370 to their intermediate phenotype. However, we found no strong evidence suggesting that the nasal  
371 protrusion is adapted for oral shelling (Figure 2). Future work should investigate other traits that  
372 may be adaptive for oral shelling such as the strength of the dorsal head of the maxilla which

373 comprises the skeletal basis of the novel nasal protrusion, structural differences in the  
374 mandibular symphysis, coronoid process, or the articular bones which may all provide additional  
375 strength or stabilization during biting, or tooth variation in the durophage pharyngeal jaws (Fig.  
376 3). Indeed, there is subtle variation apparent in the pharyngeal teeth and jaws of durophages  
377 compared to other pupfish species (Figure 3) which has not been previously reported, suggesting  
378 that pharyngeal jaws may be adapted for processing hard-shelled prey.  
379

380

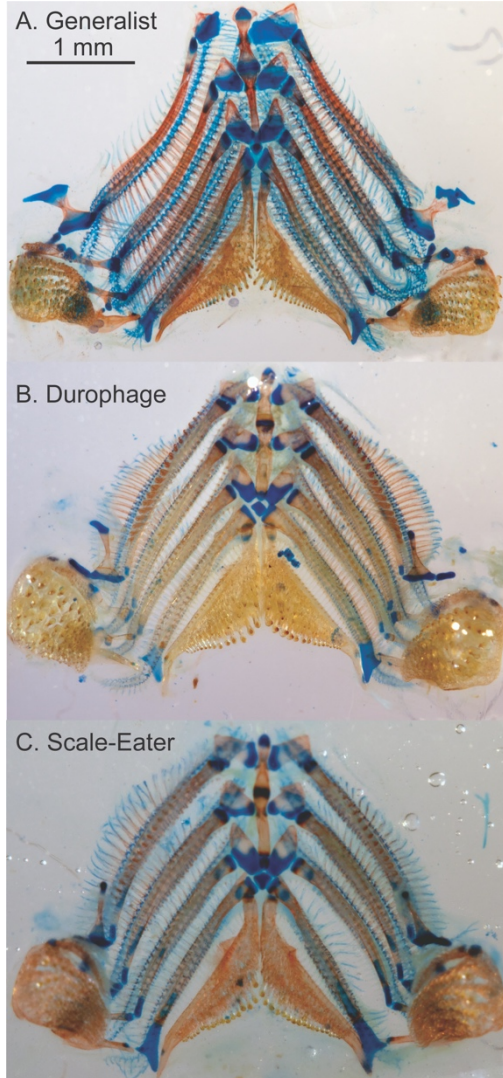

381

382 **Figure 3. Branchial skeleton and pharyngeal teeth of all three San Salvador Island species.**

383 Image of the dissected branchial skeleton and pharyngeal jaws of A) generalist, B) durophage,

384 and C) scale-eater pupfish. Scale (1mm) is shown in Figure A and is consistent across all three

385 photos. From these three individuals, the representative snail-eater has lower pharyngeal teeth

386 that are 50% longer and 75% wider than the generalist or scale-eating individuals.

387

388

389

390 *The novel nasal protrusion may be a sexually selected trait*

391 Finally, the novel nasal protrusion may be unrelated to oral shelling and instead may be used in  
392 species recognition or mate preference functions. Exaggerated traits, like the novel nasal  
393 protrusion in durophage pupfish, commonly arise via sexual selection. For example, forceps size  
394 in earwigs (Simmons and Tomkins 1996), major claw size in fiddler crabs (Rosenberg 2002),  
395 and the size of the sword tail ornament present in swordtail fish (Rosenthal and Evans 1998) are  
396 all thought to be sexually selected traits. Two commonly invoked hallmarks of a sexually  
397 selected trait are 1) allometric scaling compared to body size and 2) that the trait is sexually  
398 dimorphic (Kodric-Brown and Brown 1984; Kodric-Brown et al. 2006; Shingleton and Frankino  
399 2013). In pupfish, there is a weak positive relationship between standard length and nasal  
400 protrusion size observed for generalists (Figure S1A,  $\text{generalist}_{\text{slope}} = 0.35$ ). Generalist pupfish  
401 mostly likely resemble the most recent common ancestor for the radiation, making the observed  
402 slope a good null expectation for how nasal protrusion size should scale with body size in  
403 pupfish. In durophages, we observe much stronger positive allometry of the nasal protrusion  
404 (Figure S1B,  $\text{durophage}_{\text{slope}} = 0.93$ ), in which large durophage individuals have nasal protrusion  
405 sizes more than twice as large as those in large generalists. However, we found no significant  
406 difference in nasal protrusion size between male and female durophages when accounting for  
407 these size differences (LM,  $P=0.96$ ).

408

#### 409 **Conclusion**

410 In conclusion, we did not find evidence to support that the novel nasal protrusion observed in  
411 durophagous pupfish is adapted for consuming large snails. Instead, we found that purebred  
412 durophages and their F1 and F2 hybrids have stronger preferences for consuming snails than

413 other species. We suggest that the novel nasal protrusion may be adapted for other aspects of oral  
414 shelling such as feeding efficiency, or that variation in other traits, such as the pharyngeal jaws  
415 (Figure 3), may play a larger role in oral shelling. Alternatively, this may be an example of  
416 trophic specialization due to behavioral specialization (i.e. feeding preference).  
417

418 **References**

- 419 Araújo, M. S., P. R. Guimarães, R. Svanbäck, A. Pinheiro, P. Guimarães, S. F. Dos Reis, and D.  
420 I. Bolnick. 2008. Network analysis reveals contrasting effects of intraspecific competition on  
421 individual vs. population diets. *Ecology* 89:1981–1993.
- 422 Bolnick, D. I., R. Svanbäck, J. A. Fordyce, L. H. Yang, J. M. Davis, C. D. Hulsey, and M. L.  
423 Forister. 2003. The ecology of individuals: incidence and implications of individual  
424 specialization. *The American naturalist* 161:1–28.
- 425 Conith, M. R., A. J. Conith, and R. C. Albertson. 2019. Evolution of a soft-tissue foraging  
426 adaptation in African cichlids: Roles for novelty, convergence, and constraint. *Evolution* 2072–  
427 2084.
- 428 Conith, M. R., Y. Hu, A. J. Conith, M. A. Maginnis, J. F. Webb, and R. Craig Albertson. 2018.  
429 Genetic and developmental origins of a unique foraging adaptation in a Lake Malawi cichlid  
430 genus. *Proceedings of the National Academy of Sciences of the United States of America*  
431 115:7063–7068.
- 432 De Visser, J., and C. D. N. Barel. 1996. Architectonic constraints on the hyoid's optimal starting  
433 position for suction feeding of fish. *Journal of Morphology* 228:1–18.
- 434 Futuyman, D. J., and G. Moreno. 1988. The Evolution of Ecological Specialization. *Annual*  
435 *Review of Ecology and Systematics* 19:207–233.
- 436 Gidmark, N. J., N. Konow, E. LoPresti, and E. L. Brainerd. 2013. Bite force is limited by the  
437 force-length relationship of skeletal muscle in black carp, *Mylopharyngodon piceus*. *Biology*  
438 *Letters* 9.
- 439 Gidmark, N. J., C. Taylor, E. Lopresti, and E. Brainerd. 2015. Functional morphology of  
440 durophagy in black carp, *Mylopharyngodon piceus*. *Journal of Morphology* 276:1422–1432.

- 441 Grubich, J. 2003. Morphological convergence of pharyngeal jaw structure in durophagous  
442 perciform fish. *Biological Journal of the Linnean Society* 80:147–165.
- 443 Hagey, F. M., and J. E. Mylroie. 1995. Pleistocene lake and lagoon deposits, San Salvador  
444 island, Bahamas. *Special Papers-Geological Society of America* 77–90.
- 445 Hernandez, L. P., D. Adriaens, C. H. Martin, P. C. Wainwright, B. Masschaele, and M. Dierick.  
446 2018. Building trophic specializations that result in substantial niche partitioning within a young  
447 adaptive radiation. *Journal of Anatomy* 232:173–185.
- 448 Kodric-Brown, A., and J. H. Brown. 1984. Truth in advertising: the kinds of traits favored by  
449 sexual selection. *American Naturalist* 124:309–323.
- 450 Kodric-Brown, A., R. M. Sibly, and J. H. Brown. 2006. The allometry of ornaments and  
451 weapons. *Proceedings of the National Academy of Sciences of the United States of America*  
452 103:8733–8738.
- 453 Konings, A. 2007. *Malawi cichlids in their natural habitat* 4th Edition.
- 454 Lauder, G. V. 1983. Functional and morphological bases of trophic specialization in sunfishes  
455 (Teleostei, centrarchidae). *Journal of Morphology* 178:1–21.
- 456 Lencer, E. S., W. C. Warren, R. Harrison, and A. R. McCune. 2017. The *Cyprinodon variegatus*  
457 genome reveals gene expression changes underlying differences in skull morphology among  
458 closely related species. *BMC Genomics* 18:424.
- 459 Liem, K. F. 1978. Modulatory multiplicity in the functional repertoire of the feeding mechanism  
460 in cichlid fishes. I. Piscivores. *Journal of Morphology* 158:323–360.
- 461 Liem, K. F. 1980. Adaptive significance of intra- and interspecific differences in the feeding  
462 repertoires of cichlid fishes. *Integrative and Comparative Biology* 20:295–314.
- 463 Lundeba, M., J. S. Likongwe, H. Madsen, and J. R. Stauffer. 2011. Oral shelling of *Bulinus* spp.



464 (Mollusca: Planorbidae) by the Lake Malaŵi cichlid, *Metriaclima lanisticola* (Pisces: Cichlidae).  
465 *Journal of Freshwater Ecology* 26:593–597.

466 Madsen, H., K. C. J. Kamanga, J. R. Stauffer, and J. Likongwe. 2010. Biology of the  
467 molluscivorous fish *trematocranus placodon* (pisces: Cichlidae) from lake malaŵi. *Journal of*  
468 *Freshwater Ecology* 25:449–455.

469 Martin, C. H. 2016. The cryptic origins of evolutionary novelty: 1000-fold faster trophic  
470 diversification rates without increased ecological opportunity or hybrid swarm. *Evolution*  
471 70:2504–2519.

472 Martin, C. H., and L. C. Feinstein. 2014. Novel trophic niches drive variable progress towards  
473 ecological speciation within an adaptive radiation of pupfishes. *Molecular Ecology* 23:1846–  
474 1862.

475 Martin, C. H., and M. J. Genner. 2009. High niche overlap between two successfully coexisting  
476 pairs of Lake Malawi cichlid fishes. *Canadian Journal of Fisheries and Aquatic Sciences* 66:579–  
477 588.

478 Martin, C. H., and P. C. Wainwright. 2011. Trophic novelty is linked to exceptional rates of  
479 morphological diversification in two adaptive radiations of cyprinodon pupfish. *Evolution*  
480 65:2197–2212.

481 ———. 2013*a*. A Remarkable Species Flock of Cyprinodon Pupfishes Endemic to San Salvador  
482 Island, Bahamas. *Bulletin of the Peabody Museum of Natural History* 54:231–241.

483 ———. 2013*b*. On the Measurement of Ecological Novelty: Scale-Eating Pupfish Are Separated  
484 by 168 my from Other Scale-Eating Fishes. *PLoS ONE* 8:e71164.

485 McKaye, K. R., and A. Marsh. 1983. Food switching by two specialized algae-scraping cichlid  
486 fishes in Lake Malawi, Africa. *Oecologia* 56:245–248.

- 487 Miller, M. J. 2006. The Ecology and Functional Morphology of Feeding of North American  
488 Sturgeon and Paddlefish. Pages 87–102 *in* Sturgeons and Paddlefish of North America.
- 489 Pyke, G. H. 1984. Optimal foraging theory: a critical review. *Annual review of ecology and*  
490 *systematics*. Vol. 15 15:523–575.
- 491 Ralston, K. R., and P. C. Wainwright. 1997. Functional consequences of trophic specialization in  
492 pufferfishes. *Functional Ecology* 11:43–52.
- 493 Richards, E., and C. Martin. 2017. Adaptive introgression from distant Caribbean islands  
494 contributed to the diversification of a microendemic radiation of trophic specialist pupfishes.  
495 *PLOS Genetics*.
- 496 Robinson, B. W., and D. S. Wilson. 1998. Optimal foraging, specialization, and a solution to  
497 Liem’s paradox. *American Naturalist* 151:223–235.
- 498 Rosenberg, M. S. 2002. Fiddler crab claw shape variation: A geometric morphometric analysis  
499 across the genus *Uca* (Crustacea: Brachyura: Ocypodidae). *Biological Journal of the Linnean*  
500 *Society* 75:147–162.
- 501 Rosenthal, G. G., and C. S. Evans. 1998. Female preference for swords in *Xiphophorus helleri*  
502 reflects a bias for large apparent size. *Proceedings of the National Academy of Sciences of the*  
503 *United States of America* 95:4431–4436.
- 504 Schindelin, J., I. Arganda-Carreras, E. Frise, V. Kaynig, M. Longair, T. Pietzsch, S. Preibisch, et  
505 al. 2012. Fiji: an open-source platform for biological-image analysis. *Nature Methods* 9:676–  
506 682.
- 507 Schluter, D. 1993. Adaptive radiation in sticklebacks: size, shape, and habitat use efficiency.  
508 *Ecology* 74:699–709.
- 509 ———. 1995. Adaptive Radiation in Sticklebacks: Trade-Offs in Feeding Performance and

- 510 Growth. *Ecology* 76:82–90.
- 511 Shibuya, A., J. Zuanon, and M. R. de Carvalho. 2019. Neuromast distribution and its relevance  
512 to feeding in Neotropical freshwater stingrays (Elasmobranchii: Potamotrygonidae).  
513 *Zoomorphology*.
- 514 Shingleton, A. W., and W. A. Frankino. 2013. New perspectives on the evolution of exaggerated  
515 traits. *BioEssays* 35:100–107.
- 516 Simmons, L. W., and J. L. Tomkins. 1996. Sexual selection and the allometry of earwig forceps.  
517 *Evolutionary Ecology* 10:97–104.
- 518 Sloomweg, R. 1987. Prey selection by molluscivorous cichlids foraging on a schistosomiasis  
519 vector snail, *Biomphalaria glabrata*. *Oecologia* 74:193–202.
- 520 St. John, M. E., J. A. McGirr, and C. H. Martin. 2019. The behavioral origins of novelty: did  
521 increased aggression lead to scale-eating in pupfishes? *Behavioral Ecology* 30:557–569.
- 522 Svanbäck, R., and D. I. Bolnick. 2005. Intraspecific competition affects the strength of individual  
523 specialization: An optimal diet theory method. *Evolutionary Ecology Research* 7:993–1012.
- 524 ———. 2007. Intraspecific competition drives increased resource use diversity within a natural  
525 population. *Proceedings of the Royal Society B: Biological Sciences* 274:839–844.
- 526 Vranken, N., M. Van Steenberge, and J. Snoeks. 2019. Similar ecology, different morphology:  
527 Three new species of oral-mollusc shellers from Lake Edward. *Journal of Fish Biology*.
- 528 Wainwright, P. C. 1987. Biomechanical limits to ecological performance: mollusc-crushing by  
529 the Caribbean hogfish, *Lachnolaimus maximus* (Labridae). *Journal of Zoology* 213:283–297.
- 530 Wainwright, P. C. 1991. Ecomorphology: Experimental functional anatomy for ecological  
531 problems. *Integrative and Comparative Biology* 31:680–693.
- 532 Werner, T. K., and T. W. Sherry. 1987. Behavioral feeding specialization in *Pinaroloxias*

533 inornata, the “Darwin’s Finch” of Cocos Island, Costa Rica. Proceedings of the National  
534 Academy of Sciences 84:5506–5510.

535 Winterbottom, R. 1974. The familial phylogeny of the Tetraodontiformes (Acanthopterygii:  
536 Pisces) as evidenced by their comparative myology. Smithsonian Contributions to Zoology.

537 Wueringer, B. E., L. Squire, S. M. Kajiura, N. S. Hart, and S. P. Collin. 2012. The function of  
538 the sawfish’s saw. Current Biology.

539
